# Supplementary material
Source: HighWire-hosted journal article supplement (https://www.cancerbiomed.org/content/18/3/675)
Supplement: media-1 [file media-1.pdf]

## Supplementary materials

**Table S1** Correlations between DPP10-AS1 and clinical characteristics in 94 patients with lung cancer

| Characteristics        | <i>n</i> | DPP10-AS1 levels <sup>†</sup> |      | $\chi^2$ text | <i>P</i> value |
|------------------------|----------|-------------------------------|------|---------------|----------------|
|                        |          | Low                           | High |               |                |
| Total cases            | 94       | 47                            | 47   |               |                |
| Gender                 |          |                               |      |               |                |
| Male                   | 46       | 27                            | 19   | 2.725         | 0.0988         |
| Female                 | 48       | 20                            | 28   |               |                |
| Age (years)            |          |                               |      |               |                |
| ≤ 55                   | 34       | 14                            | 20   | 0.9570        | 0.3279         |
| > 55                   | 60       | 31                            | 29   |               |                |
| Serum CYFRA21-1        |          |                               |      |               |                |
| ≤ 3.3                  | 50       | 32                            | 18   | 6.033         | 0.0140*        |
| > 3.3                  | 46       | 17                            | 27   |               |                |
| Tumor number           |          |                               |      |               |                |
| Single                 | 72       | 39                            | 33   | 2.136         | 0.1438         |
| Multiple               | 22       | 8                             | 14   |               |                |
| Tumor size (cm)        |          |                               |      |               |                |
| ≤ 5                    | 64       | 38                            | 26   | 7.050         | 0.0079**       |
| > 5                    | 30       | 9                             | 21   |               |                |
| TNM stage              |          |                               |      |               |                |
| I/II                   | 65       | 35                            | 30   | 4.191         | 0.0406*        |
| III                    | 29       | 9                             | 20   |               |                |
| Microvascular invasion |          |                               |      |               |                |
| Present                | 36       | 17                            | 19   | 0.5626        | 0.4532         |
| Absent                 | 58       | 32                            | 26   |               |                |
| Smoking history        |          |                               |      |               |                |
| Yes                    | 44       | 18                            | 26   | 1.607         | 0.2049         |
| No                     | 50       | 27                            | 23   |               |                |

<sup>†</sup>Median expression level was used as a cutoff. Low expression of DPP10-AS1 in 94 patients was defined as a value below the 50th percentile, and high expression was defined as a value above the 50th percentile. *P* values were determined with Pearson's chi-square test. \**P* < 0.05, \*\**P* < 0.01.

**Table S2** Univariate and multivariate analysis of clinicopathological variables for RFS rates in 94 patients with lung cancer

| Variables                                   | Univariate analysis |       |             | Multivariate analysis |       |             |
|---------------------------------------------|---------------------|-------|-------------|-----------------------|-------|-------------|
|                                             | P value             | HR    | 95%CI       | P value               | HR    | 95%CI       |
| Gender (male vs. female)                    | 0.324               | 1.036 | 0.575–1.686 |                       |       |             |
| Age (> 55 vs. ≤ 55 years)                   | 0.431               | 1.231 | 0.787–2.325 |                       |       |             |
| Serum CYFR1 (> 3.3 vs. ≤ 3.3 ng/mL)         | 0.336               | 0.957 | 0.794–3.240 |                       |       |             |
| Smoking history (yes vs. no)                | 0.759               | 1.325 | 0.885–3.945 |                       |       |             |
| Tumor number (single vs. multiple)          | 0.576               | 1.695 | 0.759–5.621 |                       |       |             |
| Microvascular invasion (present vs. absent) | 0.042               | 2.168 | 1.285–4.326 |                       |       |             |
| TNM stage (I/II vs. III)                    | 0.036               | 0.413 | 0.226–0.894 |                       |       |             |
| Tumor size (> 5 cm vs. ≤ 5 cm)              | 0.021               | 2.186 | 1.273–4.536 | 0.032                 | 2.304 | 1.219–3.947 |
| DPP10-AS1 expression (higher vs. lower)     | 0.009               | 2.84  | 1.363–5.975 | 0.012                 | 2.446 | 1.116–5.823 |

RFS, recurrence-free survival; HR, hazard ratio; CI, confidence interval.

**Table S3** Univariate and multivariate analysis of clinicopathological variables for OS rates in 94 patients with lung cancer

| Variables                                   | Univariate analysis |       |             | Multivariate analysis |       |             |
|---------------------------------------------|---------------------|-------|-------------|-----------------------|-------|-------------|
|                                             | P value             | HR    | 95%CI       | P value               | HR    | 95%CI       |
| Gender (male vs. female)                    | 0.527               | 1.196 | 0.687–2.080 |                       |       |             |
| Age (> 55 vs. ≤ 55 years)                   | 0.921               | 1.001 | 0.976–1.028 |                       |       |             |
| Serum CYFR1 (> 3.3 vs. ≤ 3.3 ng/mL)         | 0.405               | 0.759 | 0.398–1.450 |                       |       |             |
| Smoking history (yes vs. no)                | 0.302               | 1.526 | 0.684–3.405 |                       |       |             |
| Microvascular invasion (present vs. absent) | 0.546               | 1.156 | 0.789–2.123 |                       |       |             |
| Tumor number (single vs. multiple)          | 0.865               | 1.191 | 0.159–8.932 |                       |       |             |
| Tumor size (> 5 cm vs. ≤ 5 cm)              | 0.008               | 3.382 | 1.374–8.330 | 0.652                 | 1.304 | 0.411–4.145 |
| TNM stage (I/II vs. III)                    | <0.001              | 0.313 | 0.114–0.899 | 0.037                 | 3.166 | 1.070–9.369 |
| DPP10-AS1 expression (higher vs. lower)     | 0.019               | 2.55  | 1.167–5.572 | 0.016                 | 2.765 | 1.212–6.307 |

OS, overall survival; HR, hazard ratio; CI, confidence interval.

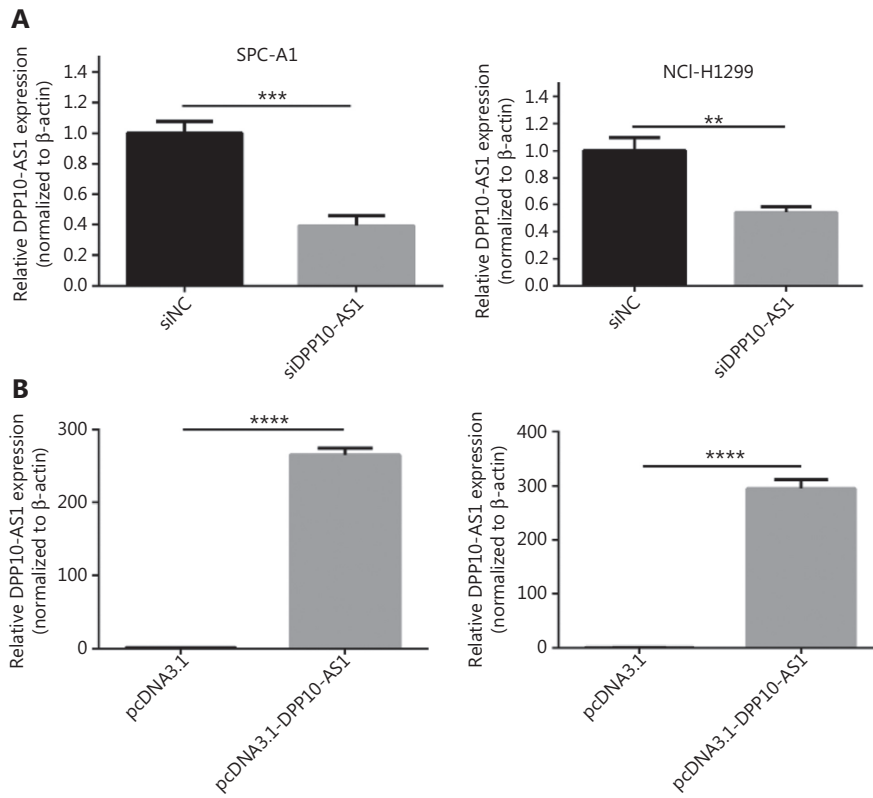

**Figure S1** Knockdown and overexpression of DPP10-AS1 in lung cancer cells. (A) qRT-PCR analysis of DPP10-AS1 in SPC-A1 and NCI-H1299 lung cancer cells transfected with control siRNA (siNC) or DPP10-AS1 siRNA (siDPP10-AS1). (B) qRT-PCR analysis of DPP10-AS1 in SPC-A1 and NCI-H1299 lung cancer cells transfected with empty vector (pcDNA3.1) or DPP10-AS1 overexpression plasmid (pcDNA3.1-DPP10-AS1). Data are shown as mean  $\pm$  SD from 3 independent experiments.  $**P < 0.01$ ,  $***P < 0.001$ ,  $****P < 0.0001$ .

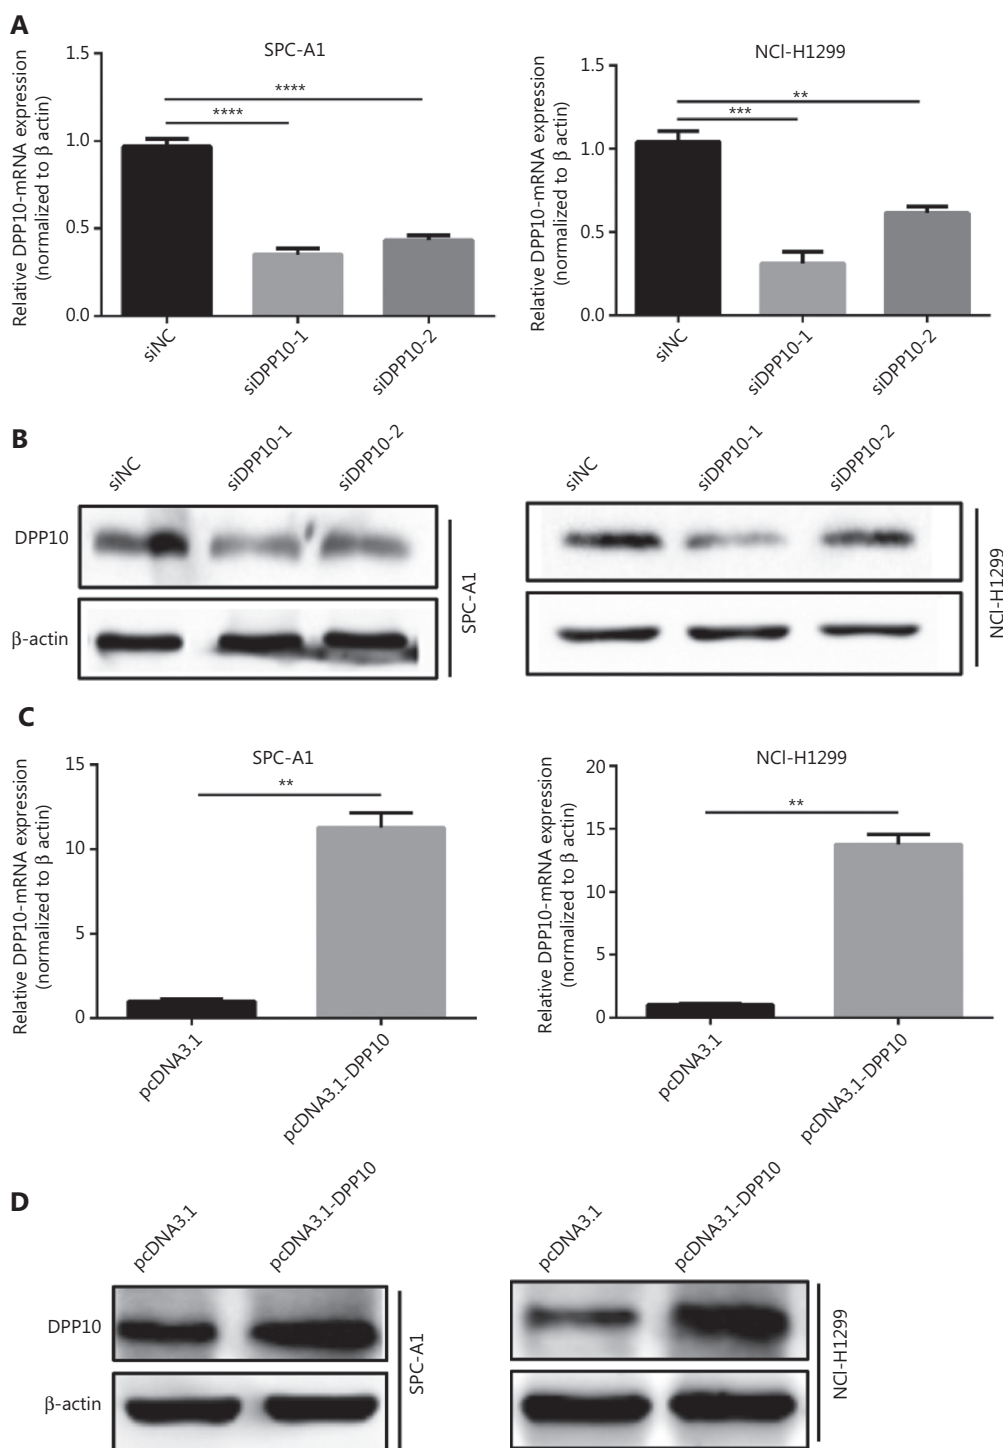

**Figure S2** Knockdown and overexpression of DPP10 in lung cancer cells. (A) qRT-PCR analysis of DPP10 mRNA levels in SPC-A1 and NCI-H1299 lung cancer cells transfected with control siRNA (siNC) or DPP10 mRNA siRNA (siDPP10-1 or siDPP10-2). (B) Western blot analysis of DPP10 protein in SPC-A1 and NCI-H1299 lung cancer cells transfected with control siRNA (siNC) or DPP10 mRNA siRNA (siDPP10-1 or siDPP10-2). (C) qRT-PCR analysis of DPP10 mRNA levels in SPC-A1 and NCI-H1299 lung cancer cells transfected with empty vector (pcDNA3.1) or DPP10-AS1 overexpression plasmid (pcDNA3.1-DPP10-AS1). (D) Western blot analysis of DPP10 protein in SPC-A1 and NCI-H1299 lung cancer cells transfected with empty vector (pcDNA3.1) or DPP10-AS1 overexpression plasmid (pcDNA3.1-DPP10-AS1). Data are shown as mean  $\pm$  SD from 3 independent experiments. \*\* $P$  < 0.01, \*\*\* $P$  < 0.001, \*\*\*\* $P$  < 0.0001.

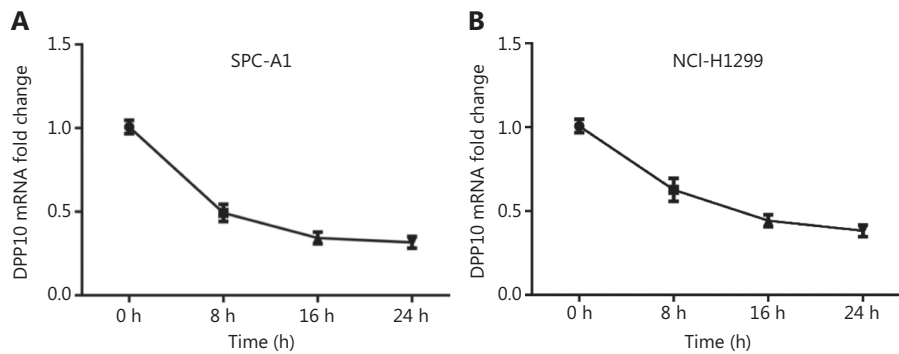

**Figure S3** Effect of actinomycin D on DPP10 mRNA stability. (A) SPC-A1 cells; (B) NCI-H1299 cells.

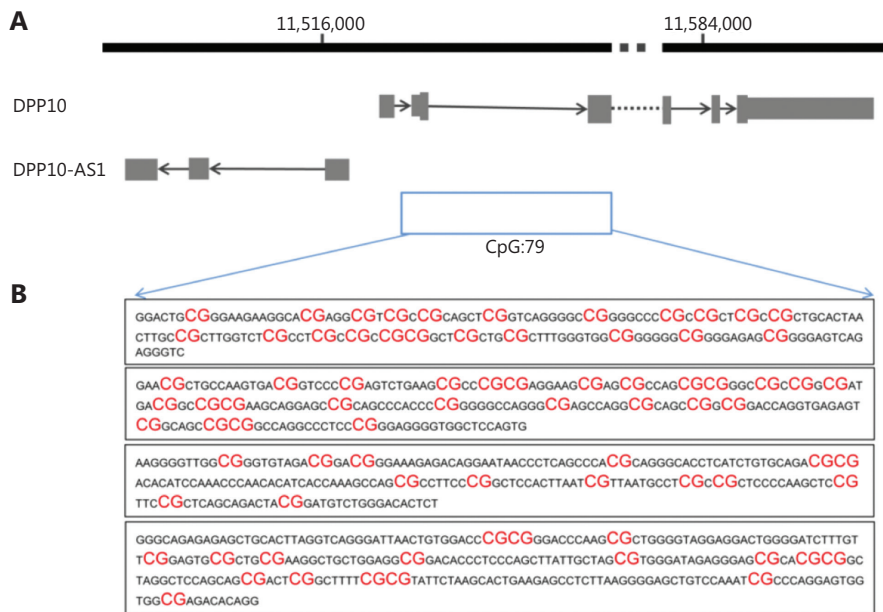

**Figure S4** DNA methylation analysis of DPP10 and DPP10-AS1 genes. (A) Predicted CpG islands (gray boxes) located in 5'-flanking regions of DPP10-AS1 and DPP10 genes (black boxes). Dotted lines indicate the positions of DNA methylation analysis in this study. (B) The sites of DNA methylation (CpG sites in red) in the sequences of the DPP10 and DPP10-AS1 promoter regions.
